# Supplementary material for: miR-500a-3p promotes cancer stem cells properties via STAT3 pathway in human hepatocellular carcinoma
Source: PubMed Central journal article supplement (PMC5532790; doi:10.1186/s13046-017-0568-3), 2017-07-27
Supplement: 13046_2017_568_MOESM2_ESM.pdf [file 13046_2017_568_MOESM2_ESM.pdf]

**TableS2. A list of primers used in the reactions for real-time RT-PCR.**

| <b>Real-time PCR primer:</b> |                         |
|------------------------------|-------------------------|
| PTPN4-up                     | CAACAAGACTTGCCCCTGAT    |
| PTPN4-dn                     | GCCCGAGACAGACAGCATAC    |
| PTPN11-up                    | CTGCCTCCACACCAGTGATA    |
| PTPN11-dn                    | GGAGCCTGAGCAAGGAGC      |
| SOCS2-up                     | GGAGGACGGATGACAAAGTC    |
| SOCS2-dn                     | AGACTCTCCGGACTGAGG      |
| SOCS4-up                     | TTCTTCTGGGCACTTTCTGG    |
| SOCS4-dn                     | AGACTGATGGCGATGGTGAT    |
| SOCS6-up                     | CTTCTGTGCCAGTGAGTCCA    |
| SOCS6-dn                     | ACGATGATGTCCCTCCACTC    |
| BCL-2-up                     | GTGGATGACTGAGTACCTGAACC |
| BCL-2-dn                     | AGACAGCCAGGAGAAATCAAAC  |
| MCL1-up                      | GAGGAGGACGAGTTGTACCG    |
| MCL1dn                       | ATGTCCAGTTTCCGAAGCAT    |
| BCL-xL-up                    | GGTATTGGTGAGTCGGATCG    |
| BCL-xL-dn                    | TGCTGCATTGTTCCCATAGA    |
| GAPDH-up                     | ATCCACCCATGGCAAATTC     |
| GAPDH-dn                     | TGGGATTTCCATTGATGACAAG  |
