# Supplementary material for: miR-500a-3p promotes cancer stem cells properties via STAT3 pathway in human hepatocellular carcinoma
Source: PubMed Central journal article supplement (PMC5532790; doi:10.1186/s13046-017-0568-3), 2017-07-27
Supplement: 13046_2017_568_MOESM4_ESM.pdf [file 13046_2017_568_MOESM4_ESM.pdf]

**Table S3. The clinicopathological characteristics in 120 hepatocellular carcinoma patients**

| Parameters      | Number of cases | Parameters                      | Number of cases |
|-----------------|-----------------|---------------------------------|-----------------|
| Gender          |                 | Age (years)                     |                 |
| Female          | 42              | <60                             | 57              |
| Male            | 78              | ≥60                             | 63              |
| AFP             |                 | Differentiation                 |                 |
| <400            | 50              | High/moderate                   | 50              |
| ≥400            | 70              | Poor                            | 70              |
| Clinical stage  |                 | T stage                         |                 |
| I               | 28              | T <sub>1</sub> – T <sub>2</sub> | 62              |
| II – IV         | 92              | T <sub>3</sub> – T <sub>4</sub> | 58              |
| N stage         |                 | M stage                         |                 |
| N <sub>0</sub>  | 49              | M <sub>0</sub>                  | 57              |
| N <sub>1</sub>  | 71              | M <sub>1</sub>                  | 63              |
| Survival status |                 | Tumor size (5 cm)               |                 |
| Alive           | 67              | <5                              | 50              |
| Dead            | 53              | ≥5                              | 70              |
| Venous invasion |                 |                                 |                 |
| Negative        | 58              |                                 |                 |
| Positive        | 62              |                                 |                 |

**Abbreviation:** AFP, alpha fetoprotein.
