# Supplementary material for: miR-500a-3p promotes cancer stem cells properties via STAT3 pathway in human hepatocellular carcinoma
Source: PubMed Central journal article supplement (PMC5532790; doi:10.1186/s13046-017-0568-3), 2017-07-27

# Supplemental Figure 4

**A**

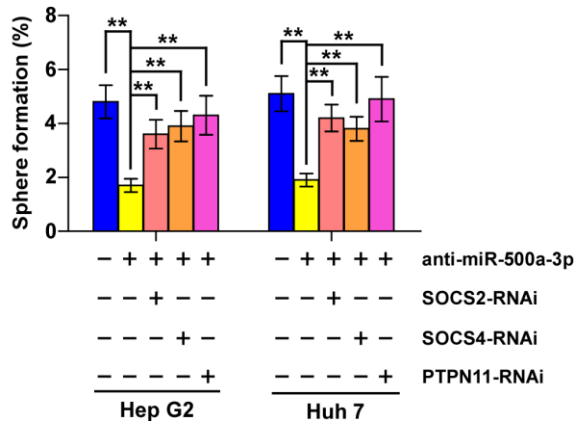

**B**

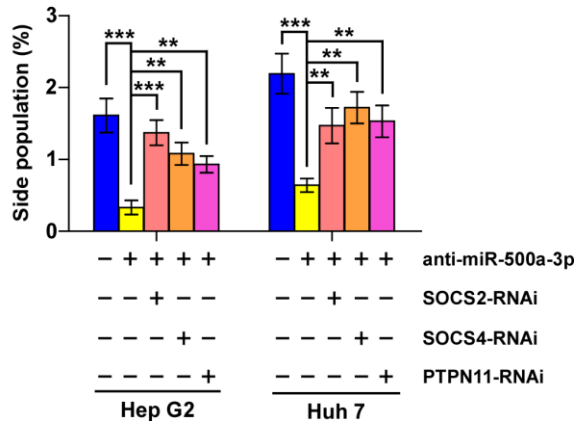

Supplement: 13046_2017_568_MOESM8_ESM.pdf [file 13046_2017_568_MOESM8_ESM.pdf]
