# Supplementary material for: miR-500a-3p promotes cancer stem cells properties via STAT3 pathway in human hepatocellular carcinoma
Source: PubMed Central journal article supplement (PMC5532790; doi:10.1186/s13046-017-0568-3), 2017-07-27
Supplement: 13046_2017_568_MOESM9_ESM.pdf [file 13046_2017_568_MOESM9_ESM.pdf]

### Supplemental Figure 5

|                  | Inoculation of Huh 7 cell number |                   |                   |
|------------------|----------------------------------|-------------------|-------------------|
|                  | 1X10 <sup>5</sup>                | 1X10 <sup>4</sup> | 1X10 <sup>3</sup> |
| control          | 6/6                              | 4/6               | 0/6               |
| miR-500a-3p      | 6/6                              | 6/6               | 5/6               |
| NC               | 6/6                              | 3/6               | 0/6               |
| anti-miR-500a-3p | 5/6                              | 0/6               | 0/6               |
