# Supplementary material for: miR-500a-3p promotes cancer stem cells properties via STAT3 pathway in human hepatocellular carcinoma
Source: Springer Nature journal article supplement (doi:10.1186/s13046-017-0568-3), 2017-07-27

### Supplemental Figure 6

**A**

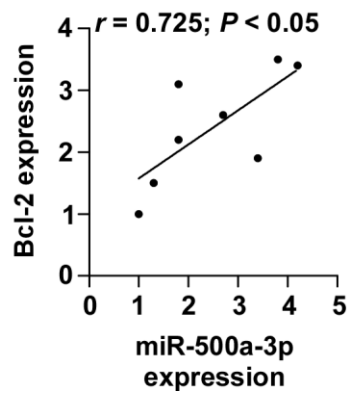

**B**

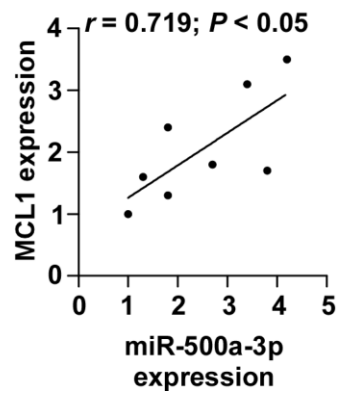

**C**

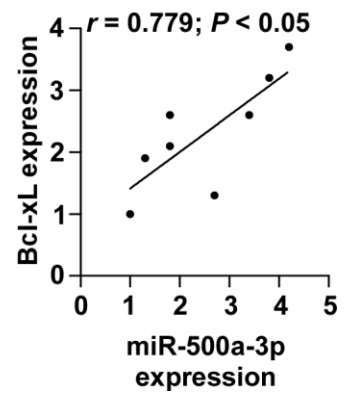

Supplement: 13046_2017_568_MOESM10_ESM.pdf [file 13046_2017_568_MOESM10_ESM.pdf]
