# Supplementary material for: miR-500a-3p promotes cancer stem cells properties via STAT3 pathway in human hepatocellular carcinoma
Source: Springer Nature journal article supplement (doi:10.1186/s13046-017-0568-3), 2017-07-27
Supplement: MOESM1 [file 13333638]

**Table S1. A list of primers used in the reactions for clone PCR.**

| <b>Used for subcloning and plasmid construction:</b> |                            |
|------------------------------------------------------|----------------------------|
| miR-500a-clone-F                                     | TTGAACCAAGGTTTCGTAAATACCAA |
| miR-500a-clone-R                                     | AAAGGCAGAGAATCTTTTCTCCTGC  |
| SOCS2-3UTR-22nt-clone-F                              | TGTCTCACATAGAGTATCTCCGAAT  |
| SOCS2-3UTR-1566nt-clone-R                            | TCCAGTAAGCAGGTTTTATTACAAT  |
| SOCS4-3UTR-44nt-clone-F                              | TAACAGGATGGGAACATGGG       |
| SOCS4-3UTR-1585nt-clone-R                            | CTTACCACACTATTTTCTTTCACCA  |
| PTPN11-3UTR-198nt-clone-F                            | CTTCCCAATTACTCATTTCTCA     |
| PTPN11-3UTR-1993nt-clone-R                           | CCAAACTACCCCAAAGTCTCAA     |
