# Supplementary material for: miR-500a-3p promotes cancer stem cells properties via STAT3 pathway in human hepatocellular carcinoma
Source: Springer Nature journal article supplement (doi:10.1186/s13046-017-0568-3), 2017-07-27
Supplement: MOESM5 [file 13333638]

**Table S4. The correlation between miR-500a-3p and clinicopathological characteristics in 120 patients with hepatocellular carcinoma.**

| Parameters                      | Number of cases | miR-500a-3p expression |      | <i>P</i> values |
|---------------------------------|-----------------|------------------------|------|-----------------|
|                                 |                 | Low                    | High |                 |
| <b>Gender</b>                   |                 |                        |      |                 |
| Female                          | 42              | 24                     | 18   | 0.251           |
| Male                            | 78              | 36                     | 42   |                 |
| <b>Age (years)</b>              |                 |                        |      |                 |
| <60                             | 57              | 32                     | 25   | 0.200           |
| ≥60                             | 63              | 28                     | 35   |                 |
| <b>AFP</b>                      |                 |                        |      |                 |
| <400                            | 50              | 31                     | 19   | 0.026*          |
| ≥400                            | 70              | 29                     | 41   |                 |
| <b>Differentiation</b>          |                 |                        |      |                 |
| High/moderate                   | 50              | 27                     | 23   | 0.459           |
| Poor                            | 70              | 33                     | 37   |                 |
| <b>T stage</b>                  |                 |                        |      |                 |
| T <sub>1</sub> – T <sub>2</sub> | 62              | 34                     | 28   | 0.273           |
| T <sub>3</sub> – T <sub>4</sub> | 58              | 26                     | 32   |                 |
| <b>N stage</b>                  |                 |                        |      |                 |
| N <sub>0</sub>                  | 49              | 28                     | 21   | 0.194           |
| N <sub>1</sub>                  | 71              | 32                     | 39   |                 |
| <b>M stage</b>                  |                 |                        |      |                 |
| M <sub>0</sub>                  | 57              | 36                     | 21   | 0.006*          |
| M <sub>1</sub>                  | 63              | 24                     | 39   |                 |
| <b>Clinical stage</b>           |                 |                        |      |                 |
| I                               | 28              | 20                     | 8    | 0.010*          |
| II - IV                         | 92              | 40                     | 52   |                 |
| <b>Tumor size (cm)</b>          |                 |                        |      |                 |
| <5                              | 50              | 31                     | 19   | 0.041*          |
| ≥5                              | 70              | 29                     | 41   |                 |
| <b>Venous invasion</b>          |                 |                        |      |                 |
| Negative                        | 58              | 35                     | 23   | 0.029*          |
| Positive                        | 62              | 25                     | 37   |                 |
